# Supplementary material for: In Vivo Time-Lapse Imaging and Analysis of Dendritic Structural Plasticity in Xenopus laevis Tadpoles
Source: HighWire-hosted journal article supplement (doi:10.1101/pdb.prot106781), 2021-03-31
Supplement: Supplemental_Movie_Legends.docx [file Supplemental_Movie_Legends.docx]

**Supplemental Movie Legends**

Supplemental Movie S1. An example of a 3D image of a GFP-labeled tectal neuron and its reconstructed dendritic arbor. Reproduced from Lee et al. 2013, with permission from Springer Nature.

Supplemental Movie S2. An example of the matching process using 4D SPA. Modified from Lee et al. 2013, with permission from Springer Nature.
